# Supplementary material for: Solid supported fluoronitroaryl triazenes as immobilized and convertible Sanger reagents – synthesis and SNAr reactions towards a novel preparation of 1-alkyl-5-nitro-1H-benzotriazolesElectronic supplementary information (ESI) available: experimental procedures. See http://www.rsc.org/suppdata/cc/b2/b201489k/
Source: Royal Society of Chemistry journal article supplement (doi:10.1039/b201489k), 2002-05-17
Supplement: b201489k.doc [file b201489k.doc]

Electronic Suplementary Information

Solid supported fluoronitroaryl triazenes as immobilized and convertible Sanger reagents – synthesis and SNAr reactions towards a novel preparation of 1-alkyl-5-nitro-1*H*-benzotriazoles

Matthias E. P. Lormann,*a,b* Catherine H. Walker,*a* Mazen Es-Sayedc and Stefan Bräse*a,b**

a RWTH Aachen, Institut für Organische Chemie, Professor-Pirlet-Str. 1, D-52074 Aachen, Germany

b Kekulé-Institut für Organische Chemie und Biochemie der Rheinischen Friedrich-Wilhelms-Universität Bonn, Gerhard-Domagk-Str. 1, D-53121 Bonn, Germany. Fax +(49) 228 228 739608; Tel +49 228 732653/71; Email: [braese@uni-bonn.de](mailto:braese@oc.rwth-aachen.de)

*c Bayer AG, GB Pflanzenschutz, Alfred-Nobel-Str. 50, D-40789 Monheim, Germany*

Representative procedure for the synthesis of resin **4**: With continuous stirring, 2.5 equivalents of 4-fluoro-3-nitroaniline **1** (4.02 g, 26 mmol) was dissolved in 50 ml dry dichloromethane and 20 ml of CH3CN. The solution was then cooled to -10oC. By slow, drop wise addition 2.5 equivalents of trifluoroacetic acid were added, followed by 2.5 equivalents of *i*-C5H11ONO, which was also added slowly in two stages about 30 minutes apart. The reaction mixture was then stirred for 1 hour between –10 oC and –5 oC. Ether (50 ml) was added the reaction, which was cooled in an acetone/dry ice bath, the reaction was stopped stirring at this point. The solvent was decanted and a further 50 ml of ether was added. This washing process was repeated three times. The resulting suspension was warmed to above –15 oC and 1 equivalent of benzylamino methyl polystyrene (10 g) and ~20 ml pyridine were added. The reaction was stirred for a few minutes until all of the resin has turned a red colour. The resin was then washed in a 3:1 ratio mixture of absolute DMA and pyridine and then washed once with diethyl ether, and then distilled pentane (to shrink the resin). The resin **4** was then washed with alternate cycles of diethyl ether and dichloromethane until the resin was clean and no colour could be seen in the solvents after washing. To finish the resin was washed with distilled pentane and then freeze dried over night. To the dry resin **4**, a 2-10 fold excess of nucleophile, 10 eq. of Cs2CO3 or abs. pyridine and 5 ml dry DMF were added. The reaction mixture was heated to 60 °C for 12 h. After cooling to rt the resin was washed with water, THF, methanol (3 cycles) and CH2Cl2, methanol (3 cycles). Afterwards the resin **6** was freeze dried over night, if not directly cleaved to the products **7**or **8**.

Procedure for the cleavage of resin **14** to yield benzotriazoles: Approximately 100 mg of the resin was treated with 2 ml of a 10 % solution of TFA in CH2Cl2. The residue was filtered off and the resin was washed with 2 ml of methanol. The combined solvents were removed in vacuo. In general, the Benzotriazoles do not need further purification. The examples in liquid phase were purified by column chromatography using SiO2 as stationary and CH2Cl2 as mobile phase.

All new non-polymeric compounds were characterised by NMR, IR and MS. The purity was determined using HPC, GC, GC-Ms and/or NMR techniques. Polymeric compunds were characterised using IR, 13C, 19F-NMR and elemental analysis (C, H, N).
